# Supplementary material
Source: publisher site journal article supplement (https://www.dovepress.com/article/217950)
Supplement: Supplementary file 1 [file get_supplementary_file.php]

**Appendix** 1 Questionnaire Survey

**1) ¿What is your gender?**

( ) Male

( ) Female

**2) ¿What is your age group in years?**

( ) 18-21

( ) 22-32

( ) 33-43

( ) 44-65

( ) >65

**3) ¿Did you donate blood before?**

( ) Yes

( ) No

**4) What is your motivation to donate blood?**

( ) Relative or a friend needs blood

( ) Urgent call for blood

( ) Seeing or receiving an advertising campaign

( ) Friends or relatives are blood donors and they encourage me

( ) Humane solidarity

( ) Personal satisfaction of helping others

( ) Beneficial to my health

( ) My blood type is rare and thus always necessary

**5) ¿What are your inhibitors to donate?**

( ) Fear of needles

( ) Fear of infectious disease transmission

( ) The sight of blood is unpleasant

( ) They give nothing in return

( ) I can´t donate due to my health condition

( ) I have been deferred from donation before)

**6) ¿ What social media do you use frequently**

( ) WhatsApp

( ) Twitter

( ) Snapchat

( ) Instagram

( ) Facebook

( ) YouTube

( ) Telegram

( ) Others

**7) ¿Did you ever receive broadcasts or see a post or campaigning requesting for blood donation on social media?**

( ) Yes

( ) No

**8) ¿How frequent did you receive a broadcast or read a post requesting for blood donation on the social media?**

( ) First time

( ) Frequently

( ) Occasionally

**9) ¿At which social media did you receive the blood donations requests more often?**

( ) WhatsApp

( ) Twitter

( ) Snapchat

( ) Instagram

( ) Facebook

( ) YouTube

( ) Telegram

( ) Others

**10) ¿What social media do you prefer to receive and transmit blood donations requests or campaign advertisements?**

( ) WhatsApp

( ) Twitter

( ) Snapchat

( ) Instagram

( ) Facebook

( ) YouTube

( ) Telegram

( ) Others

**11) ¿What are the sources of broadcasts or post from which you receive the requests of blood donation**

( ) Friends

( ) Family

( ) Organizations

( ) Anonymous

( ) Others

**12) ¿What is your most likely response when you receive the blood donation request on social media?**

( ) Nothing

( ) Share it with others

( ) It encourages me to donate blood only

( ) I would like to donate but I can´t because of health problems

( ) Other
